# Supplementary material for: HOXC10 promotes migration and invasion via the WNT-EMT signaling pathway in oral squamous cell carcinoma
Source: PubMed Central journal article supplement (PMC6746115; doi:10.7150/jca.30645), 2019-07-25
Supplement: jcav10p4540s1.pdf [file jcav10p4540s1.pdf]

Table S1: Statistical Analyses of Factors Associated With Survival in OSCC Patients with the Multivariate Cox Proportional Hazards Model.

| Variables             | Overall survival |                    | P value      |
|-----------------------|------------------|--------------------|--------------|
|                       | RR               | 95% CI             |              |
| HOXC10 expression     |                  |                    |              |
| Positive VS negative  | <b>2.551</b>     | <b>1.167-4.319</b> | <b>0.005</b> |
| Gender                |                  |                    |              |
| Male VS female        | 0.721            | 0.327-2.120        | 0.713        |
| Age                   |                  |                    |              |
| <60 VS ≥60            | 1.413            | 0.899-2.553        | 0.912        |
| Smoking               |                  |                    |              |
| Yes VS no             | 0.821            | 0.335-2.117        | 0.663        |
| Drinking              |                  |                    |              |
| Yes VS no             | 0.997            | 0.661-3.213        | 0.341        |
| Tumor stage           |                  |                    |              |
| 3-4 VS 1-2            | <b>3.117</b>     | <b>1.421-4.871</b> | <b>0.007</b> |
| Lymph node metastasis |                  |                    |              |
| + VS -                | <b>3.237</b>     | <b>1.378-4.691</b> | <b>0.000</b> |
| Clinical stage        |                  |                    |              |
| 3-4 VS 1-2            | <b>2.169</b>     | <b>1.214-4.641</b> | <b>0.000</b> |
| Histological type     |                  |                    |              |
| Poor VS well-moderate | 1.217            | 0.764-1.214        | 0.764        |

CI, confidence interval.

Table S2: Sequences of primers used in quantitative RT-PCR

| Target gene   | Primer | Nucleotide sequence           |
|---------------|--------|-------------------------------|
| <i>HOXC10</i> | F      | 5'-ACATCTGGAATCGCCTCAGC-3'    |
|               | R      | 5'-GGCTCTGCTCCGTCTTGATT-3'    |
| <i>WNT10B</i> | F      | 5'-CATCCAGGCACGAATGCGA-3'     |
|               | R      | 5'-CGGTTGTGGGTATCAATGAAGA-3'  |
| <i>DVL2</i>   | F      | 5'-GAGGAAGAGACTCCCTACCTG-3'   |
|               | R      | 5'-CGGGCGTTGTCATCTGAAAT-3'    |
| <i>SENP2</i>  | F      | 5'-GGCTGGTTAGGATTCTCGGC-3'    |
|               | R      | 5'-GGCAGCATTGTAGAGACTGTTTT-3' |
| <i>LRP6</i>   | F      | 5'-TTTATGCAAACAGACGGGACTT-3'  |
|               | R      | 5'-GCCTCCAACACTACAATCGTAGC-3' |
| <i>MAPK9</i>  | F      | 5'-GAAACTAAGCCGTCCTTTTCAGA-3' |
|               | R      | 5'-TCCAGCTCCATGTGAATAACCT-3'  |
| <i>PLCB1</i>  | F      | 5'-GGACTGACCCTCAGGGATTTT-3'   |
|               | R      | 5'-AAGCCACGAGATTCAAATGGG-3'   |
| <i>FZD6</i>   | F      | 5'-ATGGCCTACAACATGACGTTT-3'   |
|               | R      | 5'-GTTTACGACAAGGTGGAACCA-3'   |
| <i>LRP5</i>   | F      | 5'-ACTCGCTGTGAGGAGGACAAT-3'   |
|               | R      | 5'-GGCAGGCGCATGTGTAGAA-3'     |
| <i>ACTB</i>   | F      | 5'-CATGTACGTTGCTATCCAGGC-3'   |
|               | R      | 5'-CTCCTTAATGTCACGCACGAT-3'   |

Table S3. UALCAN is designed to detect coordinated differences in the expression of predefined sets of functionally HOXC10-correlated genes.

| GENES     | Pearson CC |
|-----------|------------|
| HOXC11    | 0.54       |
| HOXC9     | 0.49       |
| HOXC6     | 0.49       |
| LOC646762 | 0.48       |
| HOXC4     | 0.48       |
| LRRC37B2  | 0.46       |
| LOC400043 | 0.44       |
| NBPF15    | 0.43       |
| LOC200030 | 0.43       |
| WHAMML1   | 0.43       |
| HOXC8     | 0.43       |
| CCDC112   | 0.41       |
| PRKCSH    | 0.41       |
| ZNF354B   | 0.41       |
| RGPD1     | 0.41       |
| NBPF9     | 0.41       |
| PELI2     | 0.41       |
| C1orf96   | 0.4        |
| CTPS2     | 0.4        |
| RIC8B     | 0.4        |
| BMPR1A    | 0.39       |
| ZNF642    | 0.39       |
| KCNMB3    | 0.39       |
| TSPYL5    | 0.39       |

|          |      |
|----------|------|
| ZNF639   | 0.39 |
| CEP290   | 0.38 |
| RFXAP    | 0.38 |
| CXorf23  | 0.38 |
| C19orf44 | 0.38 |
| SLC39A10 | 0.38 |
| KIF3A    | 0.38 |
| HOXA10   | 0.38 |
| ANGEL2   | 0.38 |
| RNF216   | 0.37 |
| CAMLG    | 0.37 |
| MORN4    | 0.37 |
| UVRAG    | 0.37 |
| MAPK9    | 0.37 |
| HECTD2   | 0.37 |
| USPL1    | 0.37 |
| LETMD1   | 0.36 |
| LASS2    | 0.36 |
| ABCB10   | 0.36 |
| ZNF37B   | 0.36 |
| ZNF26    | 0.36 |
| PDE4A    | 0.36 |
| JAZF1    | 0.36 |
| RBMX     | 0.36 |
| LRRC37B  | 0.36 |
| USP27X   | 0.36 |

|           |      |
|-----------|------|
| LOC144438 | 0.36 |
| TRAF5     | 0.36 |
| ZDHHC17   | 0.36 |
| KLHL15    | 0.36 |
| DDX17     | 0.36 |
| TTC14     | 0.36 |
| MOSC2     | 0.36 |
| CPSF6     | 0.36 |
| FLVCR1    | 0.36 |
| TLL4      | 0.35 |
| RGPD6     | 0.35 |
| SLC22A5   | 0.35 |
| BIVM      | 0.35 |
| C5orf25   | 0.35 |
| POGZ      | 0.35 |
| TMED8     | 0.35 |
| TRIM52    | 0.35 |
| C7orf26   | 0.35 |
| C1orf112  | 0.35 |
| ZMYM5     | 0.35 |
| MAGEF1    | 0.35 |
| DZIP1     | 0.35 |
| PSPC1     | 0.35 |
| ZNF12     | 0.35 |
| BBS5      | 0.35 |
| DNAH14    | 0.35 |

|         |      |
|---------|------|
| ZNF333  | 0.35 |
| DBF4B   | 0.35 |
| CSRNP2  | 0.35 |
| HNRPLL  | 0.35 |
| EIF2AK1 | 0.35 |
| ZNF594  | 0.34 |
| SMARCD1 | 0.34 |
| CLK2    | 0.34 |
| FXR1    | 0.34 |
| LPHN1   | 0.34 |
| NCBP2   | 0.34 |
| POTEF   | 0.34 |
| PHKA2   | 0.34 |
| TIGD1   | 0.34 |
| SPATS2  | 0.34 |
| WDR67   | 0.34 |
| GPR89A  | 0.34 |
| TIAL1   | 0.34 |
| ZNF815  | 0.34 |
| ZNF22   | 0.34 |
| HMGB1   | 0.34 |
| KBTBD6  | 0.34 |
| NAA16   | 0.34 |
| TIGD7   | 0.34 |
| ZNF740  | 0.34 |
| ZNF514  | 0.34 |

|           |      |
|-----------|------|
| DTX3      | 0.34 |
| GON4L     | 0.34 |
| NVL       | 0.34 |
| ZBTB10    | 0.34 |
| AZIN1     | 0.34 |
| EIF5A2    | 0.34 |
| C7orf31   | 0.34 |
| MDM4      | 0.34 |
| DVL2      | 0.34 |
| NHLRC3    | 0.34 |
| LOC339047 | 0.34 |
| KIAA0907  | 0.34 |
| NEK3      | 0.34 |
| ALS2      | 0.34 |
| PCGF6     | 0.34 |
| SARM1     | 0.34 |
| C14orf101 | 0.34 |
| CENPJ     | 0.33 |
| MBTPS2    | 0.33 |
| WDR83     | 0.33 |
| DFFB      | 0.33 |
| TCTN1     | 0.33 |
| SCML1     | 0.33 |
| TTC21B    | 0.33 |
| C10orf137 | 0.33 |
| RAB11FIP2 | 0.33 |

|           |      |
|-----------|------|
| CLK2P     | 0.33 |
| ALMS1     | 0.33 |
| USP30     | 0.33 |
| SENP6     | 0.33 |
| CHRNA5    | 0.33 |
| ZNF275    | 0.33 |
| TARBP1    | 0.33 |
| LOC646214 | 0.33 |
| SLC25A36  | 0.33 |
| RBM39     | 0.33 |
| ACTR6     | 0.33 |
| ANUBL1    | 0.33 |
| ZNF558    | 0.33 |
| BRAP      | 0.33 |
| HOXA4     | 0.33 |
| PRDM5     | 0.33 |
| MAGEE1    | 0.33 |
| CREBZF    | 0.33 |
| PIGZ      | 0.33 |
| MTA1      | 0.33 |
| PMS2CL    | 0.33 |
| IRF2BP1   | 0.33 |
| ABI2      | 0.33 |
| HOXD13    | 0.33 |
| BOD1      | 0.33 |
| LOC91316  | 0.33 |



|         |      |
|---------|------|
| ESC01   | 0.33 |
| SIRT1   | 0.33 |
| SLC39A1 | 0.33 |
| LSM11   | 0.33 |
| GDPD5   | 0.32 |
| USP42   | 0.32 |
| UIMC1   | 0.32 |
| WNT10B  | 0.32 |
| DDX50   | 0.32 |
| HNRNPH1 | 0.32 |
| TCTE3   | 0.32 |
| LBR     | 0.32 |
| TBC1D12 | 0.32 |
| TUB     | 0.32 |
| HMG4    | 0.32 |
| C6orf48 | 0.32 |
| NUPL2   | 0.32 |
| TMEM136 | 0.32 |
| RFC3    | 0.32 |
| ZNF343  | 0.32 |
| SEPT7P2 | 0.32 |
| CDK20   | 0.32 |
| DMWD    | 0.32 |
| KATNAL1 | 0.32 |
| MPP2    | 0.32 |
| ADO     | 0.32 |

|            |      |
|------------|------|
| VMAC       | 0.32 |
| ZBTB39     | 0.32 |
| TSNARE1    | 0.32 |
| MLH3       | 0.32 |
| ATXN2      | 0.32 |
| PIGH       | 0.32 |
| POLR3C     | 0.32 |
| SHROOM1    | 0.32 |
| NEO1       | 0.32 |
| LIN9       | 0.32 |
| LOC285074  | 0.32 |
| CHPT1      | 0.32 |
| CHD6       | 0.32 |
| DNAJC14    | 0.32 |
| GGT7       | 0.32 |
| SFRS7      | 0.32 |
| MTR        | 0.32 |
| CCNJ       | 0.32 |
| MCM8       | 0.32 |
| DHX40      | 0.32 |
| MPHOSPH8   | 0.32 |
| KCNJ14     | 0.32 |
| RGPD4      | 0.32 |
| NCRNA00183 | 0.32 |
| NFYB       | 0.32 |
| ZNF195     | 0.32 |

|          |      |
|----------|------|
| WDR35    | 0.32 |
| PNN      | 0.32 |
| ZNF169   | 0.32 |
| CYB5D1   | 0.32 |
| FAM149A  | 0.32 |
| NEDD1    | 0.32 |
| ZNF621   | 0.32 |
| TROVE2   | 0.32 |
| GATAD2B  | 0.32 |
| EIF2C4   | 0.32 |
| PECR     | 0.31 |
| CCNB1IP1 | 0.31 |
| ZNF121   | 0.31 |
| RGPD3    | 0.31 |
| SENP5    | 0.31 |
| TTC5     | 0.31 |
| TMEM97   | 0.31 |
| ACP6     | 0.31 |
| TUG1     | 0.31 |
| C8orf51  | 0.31 |
| CPSF7    | 0.31 |
| BBS10    | 0.31 |
| C10orf35 | 0.31 |
| PARP1    | 0.31 |
| FNBP4    | 0.31 |
| C14orf4  | 0.31 |

|              |      |
|--------------|------|
| KHDC1        | 0.31 |
| SLC26A10     | 0.31 |
| ZNF187       | 0.31 |
| ZNF136       | 0.31 |
| C6orf170     | 0.31 |
| AAAS         | 0.31 |
| NCOA1        | 0.31 |
| AKAP8        | 0.31 |
| CCDC126      | 0.31 |
| KCTD18       | 0.31 |
| EIF2S3       | 0.31 |
| TCTN2        | 0.31 |
| MOAP1        | 0.31 |
| RPS6KC1      | 0.31 |
| ANKRD36B     | 0.31 |
| BAHCC1       | 0.31 |
| NAP1L1       | 0.31 |
| LUC7L3       | 0.31 |
| PIGC         | 0.31 |
| CEP135       | 0.31 |
| MAN2A2       | 0.31 |
| LOC100133991 | 0.31 |
| ACBD6        | 0.31 |
| ZNF653       | 0.31 |
| GXYLT1       | 0.31 |
| ZBTB41       | 0.31 |

|         |      |
|---------|------|
| AHCTF1  | 0.31 |
| RAVER1  | 0.31 |
| ZMYM2   | 0.31 |
| RNF41   | 0.31 |
| C3orf33 | 0.31 |
| TGDS    | 0.31 |
| ANAPC5  | 0.31 |
| RAD51L3 | 0.31 |
| ARID4B  | 0.31 |
| G2E3    | 0.31 |
| DNAL1   | 0.31 |
| RRP15   | 0.31 |
| RCOR3   | 0.31 |
| RGAG4   | 0.31 |
| BCOR    | 0.31 |
| EIF4B   | 0.31 |
| PLCB1   | 0.31 |
| SENP2   | 0.31 |
| ZCCHC8  | 0.31 |
| ZNF84   | 0.31 |
| PAN3    | 0.31 |
| DDHD1   | 0.31 |
| FOXF2   | 0.31 |
| PCMTD2  | 0.31 |
| LASS5   | 0.31 |
| SMEK1   | 0.31 |

|              |      |
|--------------|------|
| LOC100132287 | 0.31 |
| TTC31        | 0.31 |
| PIK3CA       | 0.31 |
| PAPOLA       | 0.31 |
| ZNF182       | 0.31 |
| EP400        | 0.31 |
| FAM189B      | 0.31 |
| RUNDC1       | 0.31 |
| SR140        | 0.31 |
| MAML1        | 0.31 |
| DCLRE1A      | 0.31 |
| EPM2AIP1     | 0.31 |
| HNRNPA1L2    | 0.31 |
| ZBED5        | 0.31 |
| PPPDE1       | 0.31 |
| ARL10        | 0.31 |
| ALOX12P2     | 0.31 |
| TMEM194A     | 0.31 |
| SGOL2        | 0.31 |
| IP09         | 0.3  |
| SFRS6        | 0.3  |
| C19orf2      | 0.3  |
| FAM161A      | 0.3  |
| C1orf107     | 0.3  |
| FAM156A      | 0.3  |
| CACNB3       | 0.3  |

|           |     |
|-----------|-----|
| DNASE2    | 0.3 |
| KIAA0495  | 0.3 |
| PATZ1     | 0.3 |
| RBMS3     | 0.3 |
| FZD6      | 0.3 |
| STX16     | 0.3 |
| ZNF678    | 0.3 |
| PAK2      | 0.3 |
| KLHL24    | 0.3 |
| ARNT2     | 0.3 |
| FADS1     | 0.3 |
| OPA1      | 0.3 |
| ZNF107    | 0.3 |
| TGIF2     | 0.3 |
| CHD1L     | 0.3 |
| MIPEP     | 0.3 |
| PHC1      | 0.3 |
| TBCE      | 0.3 |
| ROB03     | 0.3 |
| PCBP2     | 0.3 |
| LRP6      | 0.3 |
| MEST      | 0.3 |
| COX11     | 0.3 |
| TMX4      | 0.3 |
| LOC642852 | 0.3 |
| KIAA0753  | 0.3 |

|         |     |
|---------|-----|
| ZNF317  | 0.3 |
| IFT88   | 0.3 |
| NEURL4  | 0.3 |
| KBTD2   | 0.3 |
| CDADC1  | 0.3 |
| TSPYL2  | 0.3 |
| SFRS8   | 0.3 |
| SLC5A6  | 0.3 |
| BCORL1  | 0.3 |
| NPTXR   | 0.3 |
| ZNF711  | 0.3 |
| DNA2    | 0.3 |
| CNTROB  | 0.3 |
| C2orf56 | 0.3 |
| SNHG1   | 0.3 |
| TRIM3   | 0.3 |
| SFRS16  | 0.3 |
| MEGF8   | 0.3 |
| B3GALTL | 0.3 |
| INTS3   | 0.3 |
| CPSF1   | 0.3 |
| ZNF346  | 0.3 |
| PLEKHA8 | 0.3 |
| POFUT1  | 0.3 |
| ZNF791  | 0.3 |
| CCDC41  | 0.3 |



|          |     |
|----------|-----|
| GORAB    | 0.3 |
| TTC13    | 0.3 |
| R3HDM2   | 0.3 |
| NUP133   | 0.3 |
| SYNJ2BP  | 0.3 |
| TFCP2    | 0.3 |
| HIBADH   | 0.3 |
| ZNF251   | 0.3 |
| C5orf24  | 0.3 |
| ZNF669   | 0.3 |
| RPAP3    | 0.3 |
| ARHGEF11 | 0.3 |
| RNF219   | 0.3 |
| PRAME    | 0.3 |
| TRIM59   | 0.3 |
| NUDT17   | 0.3 |
| TRA2B    | 0.3 |
| KIAA1715 | 0.3 |
| CBFA2T2  | 0.3 |
| AURKAPS1 | 0.3 |
| GANAB    | 0.3 |
| LRP5     | 0.3 |
| DLEU2    | 0.3 |
| HHEX     | 0.3 |
| RNASEH2B | 0.3 |
| PTPDC1   | 0.3 |

|           |     |
|-----------|-----|
| DSG2      | 0.3 |
| FAM169A   | 0.3 |
| LOC400927 | 0.3 |
| ERCC3     | 0.3 |
| ZNF14     | 0.3 |
| PRKD1     | 0.3 |
| FGD1      | 0.3 |
| UBR7      | 0.3 |
| UBXN2A    | 0.3 |
| C5orf42   | 0.3 |
| SFRS14    | 0.3 |
| SV2A      | 0.3 |
| ADSS      | 0.3 |
| RNF19A    | 0.3 |
| C13orf23  | 0.3 |
| C1orf55   | 0.3 |
| ZNF354A   | 0.3 |
| C10orf28  | 0.3 |
| RABL2B    | 0.3 |
| C2orf3    | 0.3 |
| PPM1D     | 0.3 |
| RTN4R     | 0.3 |
| PRKD3     | 0.3 |
| NUPL1     | 0.3 |
| PPP1CC    | 0.3 |
| CRTC2     | 0.3 |

|           |     |
|-----------|-----|
| ZBTB8A    | 0.3 |
| CCDC150   | 0.3 |
| LOC728190 | 0.3 |
| FAM82A1   | 0.3 |

Table S4: KEGG pathways associated with the correlated genes.

| Term                                                              | Count | Genes                                                                               | <i>P</i> value |
|-------------------------------------------------------------------|-------|-------------------------------------------------------------------------------------|----------------|
| hsa03013:RNA transport                                            | 12    | NCBP2, EIF4B, SENP2, NUP133, AAAS, RGPLD1, RGPLD4, RGPLD3, EIF2S3, NUPL2, PNN, FXR1 | 4.95E-05       |
| hsa03015:mRNA surveillance pathway                                | 7     | NCBP2, PAPOLA, CPSF7, CPSF6, PPP1CC, CPSF1, PNN                                     | 0.002384187    |
| hsa04310:Wnt signaling pathway                                    | 8     | DVL2, SENP2, WNT10B, LRP6, MAPK9, PLCB1, LRP5, FZD6                                 | 0.004620306    |
| hsa00563:Glycosylphosphatidylinositol(GPI)-anchor biosynthesis    | 3     | PIGZ, PIGH, PIGC                                                                    | 0.05377096     |
| hsa04550:Signaling pathways regulating pluripotency of stem cells | 6     | DVL2, WNT10B, PCGF6, PIK3CA, BMPR1A, FZD6                                           | 0.059469658    |
